# Supplementary material
Source: PubMed Central journal article supplement (PMC5570519)
Supplement: NIHMS889588-supplement.pdf [file NIHMS889588-supplement.pdf]

## Microbial diversity: Chao1 estimate

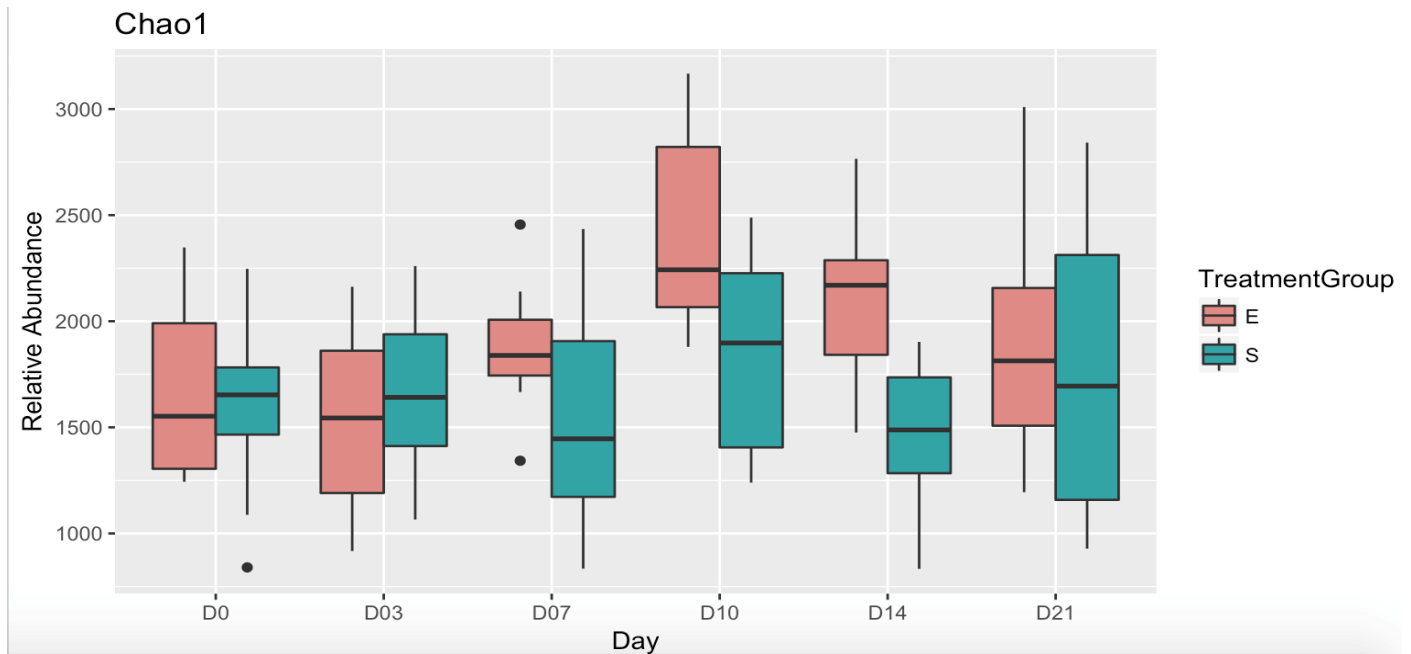

**Supplementary Figure 1: Bacterial diversity in E2 or sham treated mice.** The alpha (within-sample) diversity for each time point is shown for E2 (red bars) or sham (blue bars) treated animals as represented by Chao 1 estimate. Median and interquartile range are denoted by horizontal bars. Circles represent sample outliers. For A&B, n = 11-12 mice per group and are representative of two pooled experiments. \* =  $p < 0.05$  by Wilcoxon Rank Sum test at the indicated time points between E2- and sham- treated animals, with Benjamini-Hochberg correction for multiple comparisons.

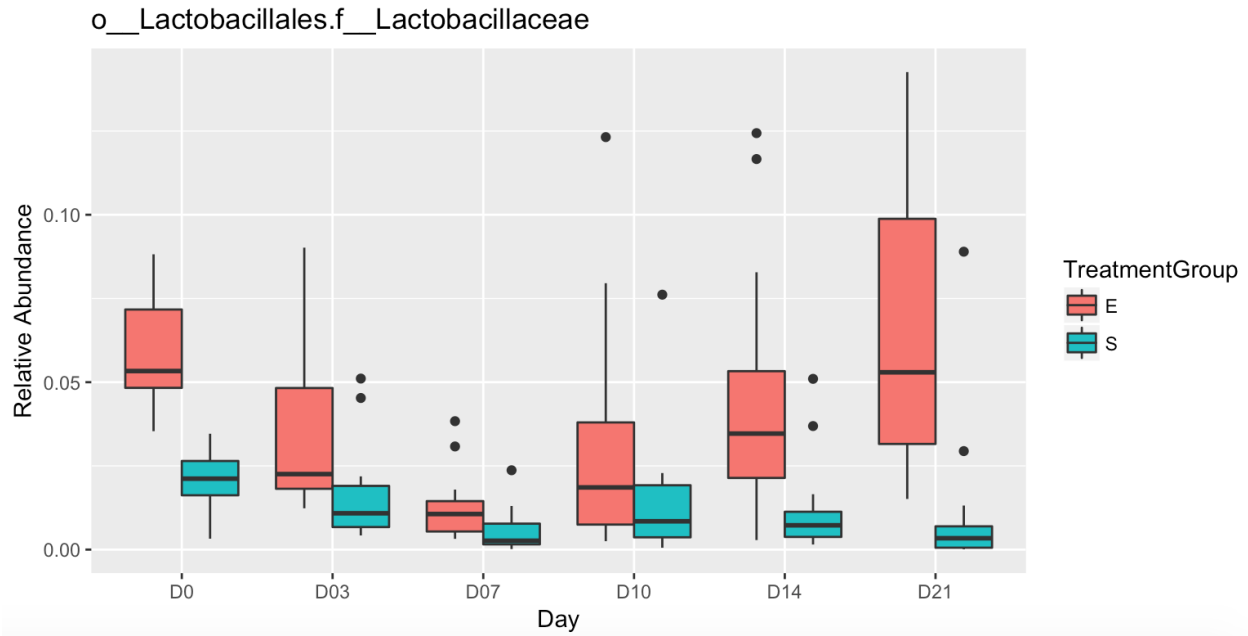

**Supplementary Figure 2: Lactobacillaceae abundance in E2 or sham treated mice.**

The Lactobacillaceae abundance for each time point is shown for E2 (red bars) or sham (blue bars) treated animals. Median and interquartile range are denoted by horizontal bars. Circles represent sample outliers. For A&B, n = 11-12 mice per group and are representative of two pooled experiments.
